# Supplementary material
Source: PubMed Central journal article supplement (PMC10689504)
Supplement: 41396_2023_1544_MOESM2_ESM.pdf [file 41396_2023_1544_MOESM2_ESM.pdf]

## **Supplementary Materials for**

Phylogenetic and ecophysiological novelty of subsurface mercury  
methylators in mangrove sediments

Songfeng Liu, Ruiwen Hu, Nenglong Peng, Zhengyuan Zhou, Ruihan Chen, Zhili He, and Cheng  
Wang\*

Cheng Wang

Email: [wangcheng5@mail.sysu.edu.cn](mailto:wangcheng5@mail.sysu.edu.cn)

### **This PDF file includes:**

Figures S1 to S22

Tables S1 to S4

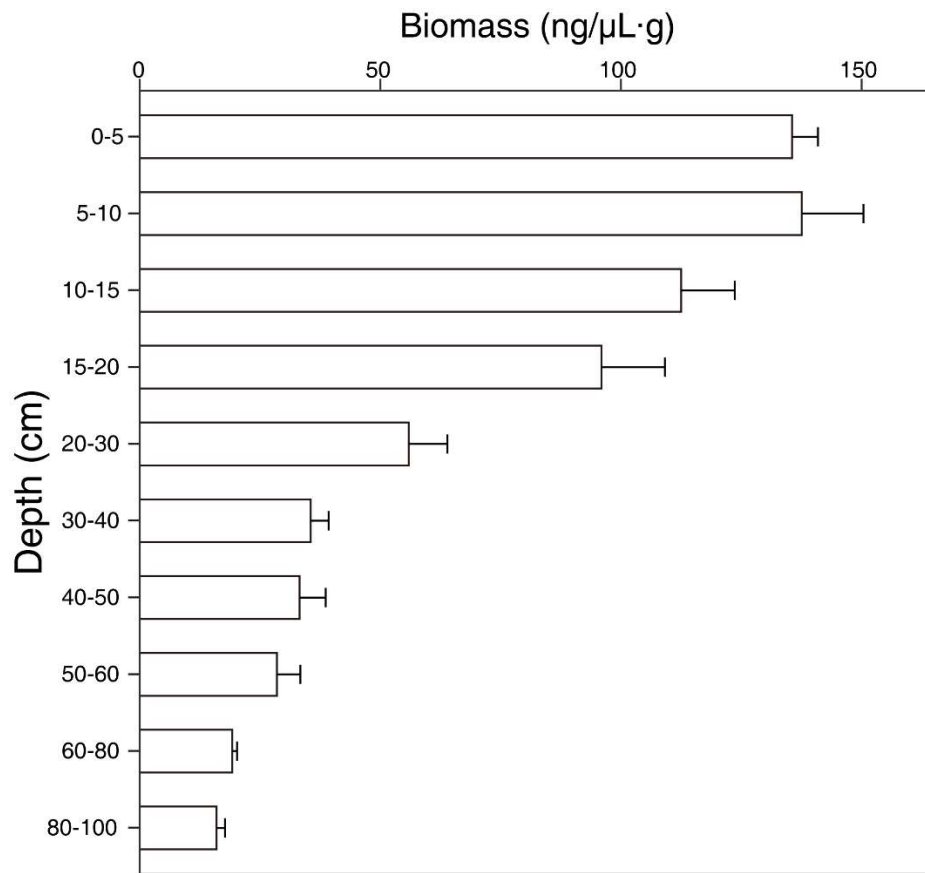

**Fig. S1.** Vertical profiles of microbial biomass across the mangrove sediment column.

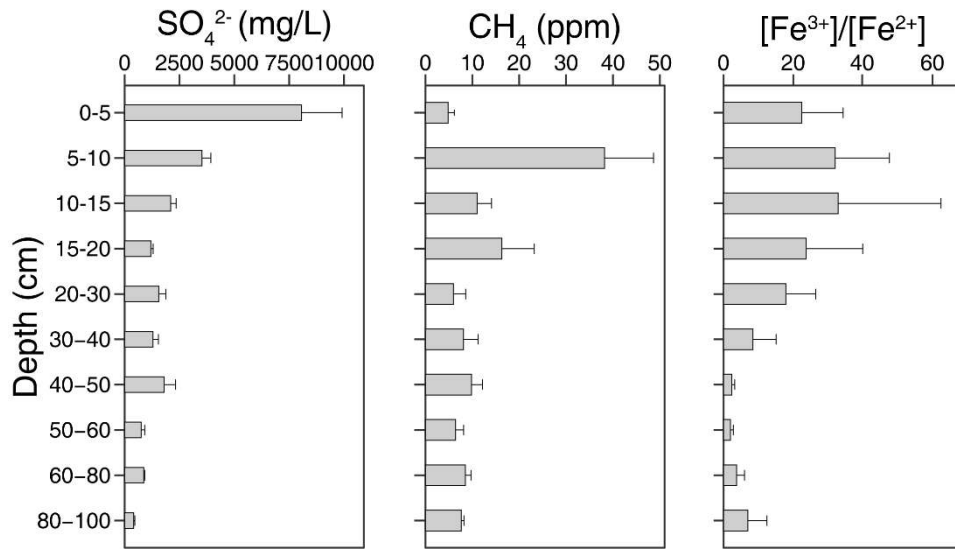

**Fig. S2.** Geochemical profiles in sampled mangrove sediments at discrete depths.

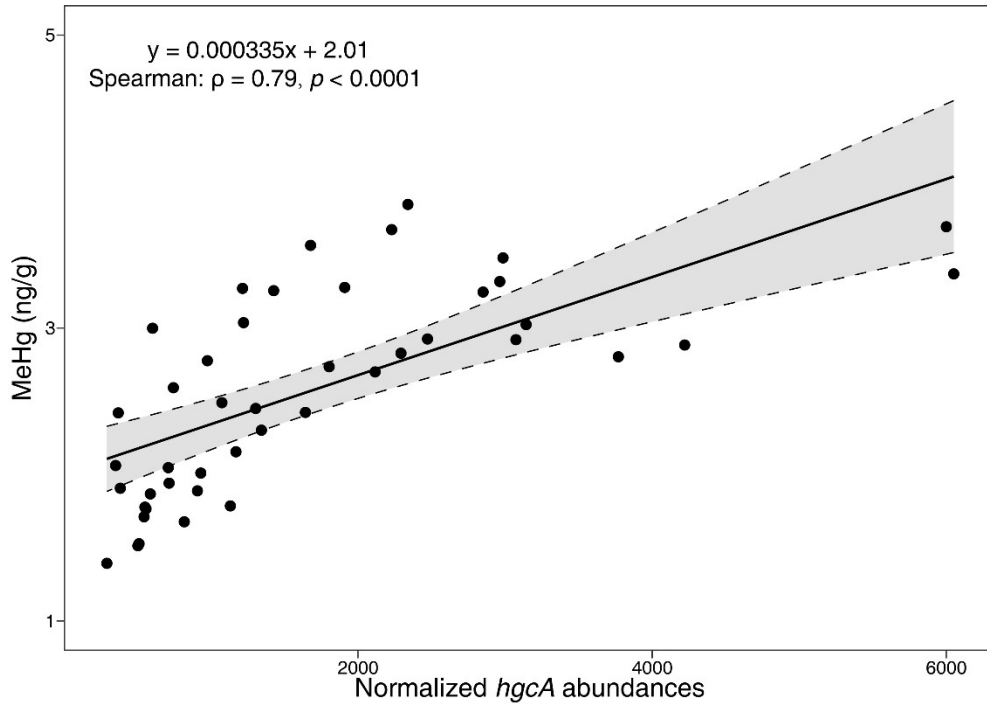

**Fig. S3.** Significant Spearman correlation between the normalized abundances of *hgcA* and the MeHg concentration across the mangrove sediment column. The gray shadow indicates the 95% confidence interval.

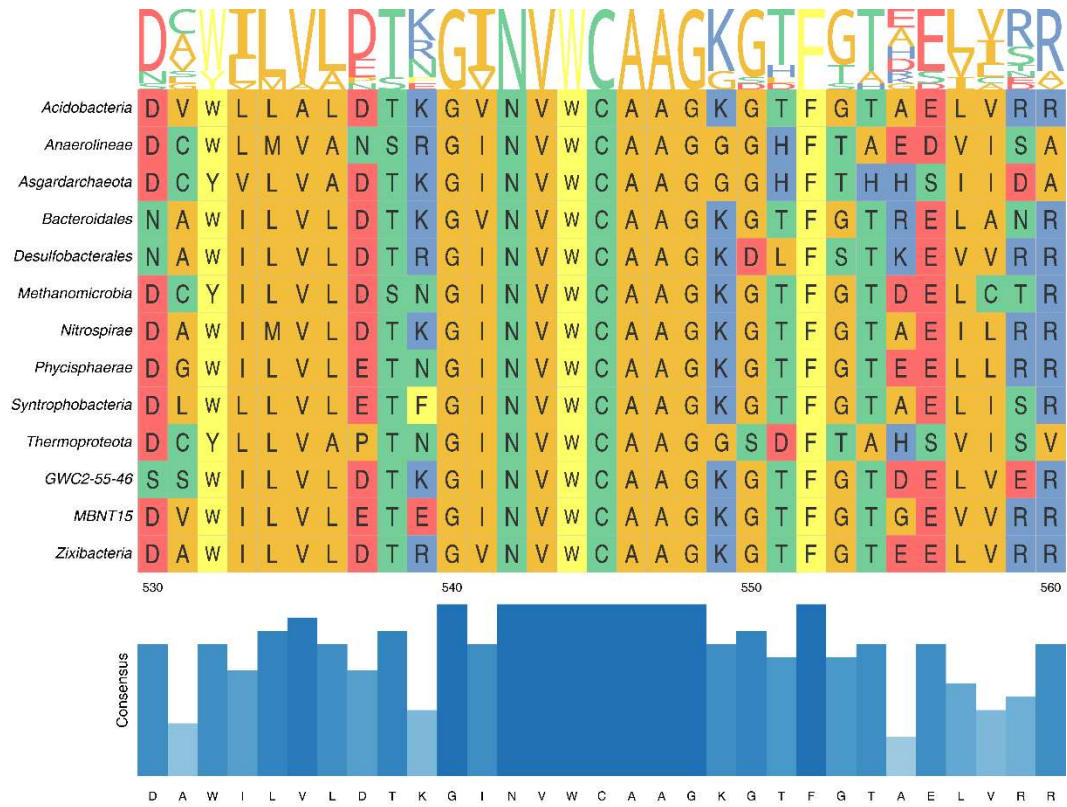

**Fig. S4.** Alignments of identified HgcA protein sequences from all Hg methylator taxa recovered from our sampled mangrove sediments.

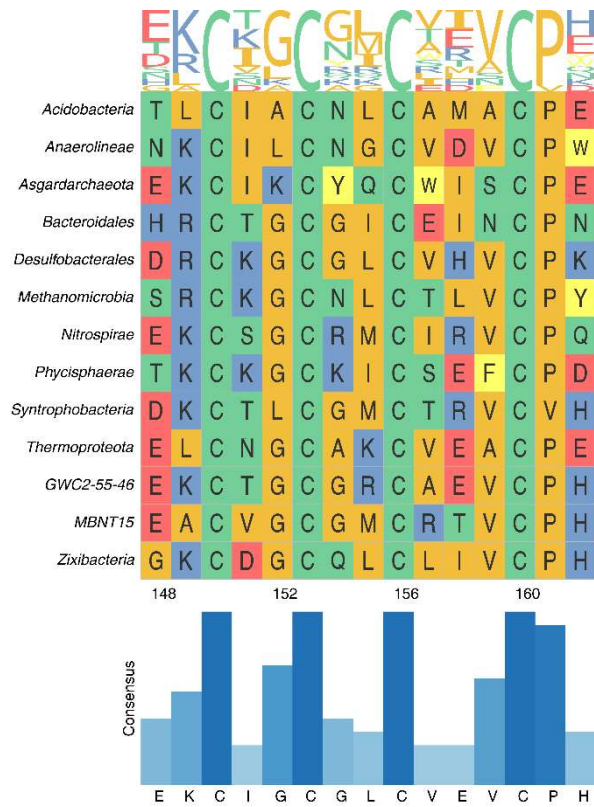

**Fig. S5.** Alignments of identified HgcB protein sequences from all Hg methylator taxa recovered from our sampled mangrove sediments.

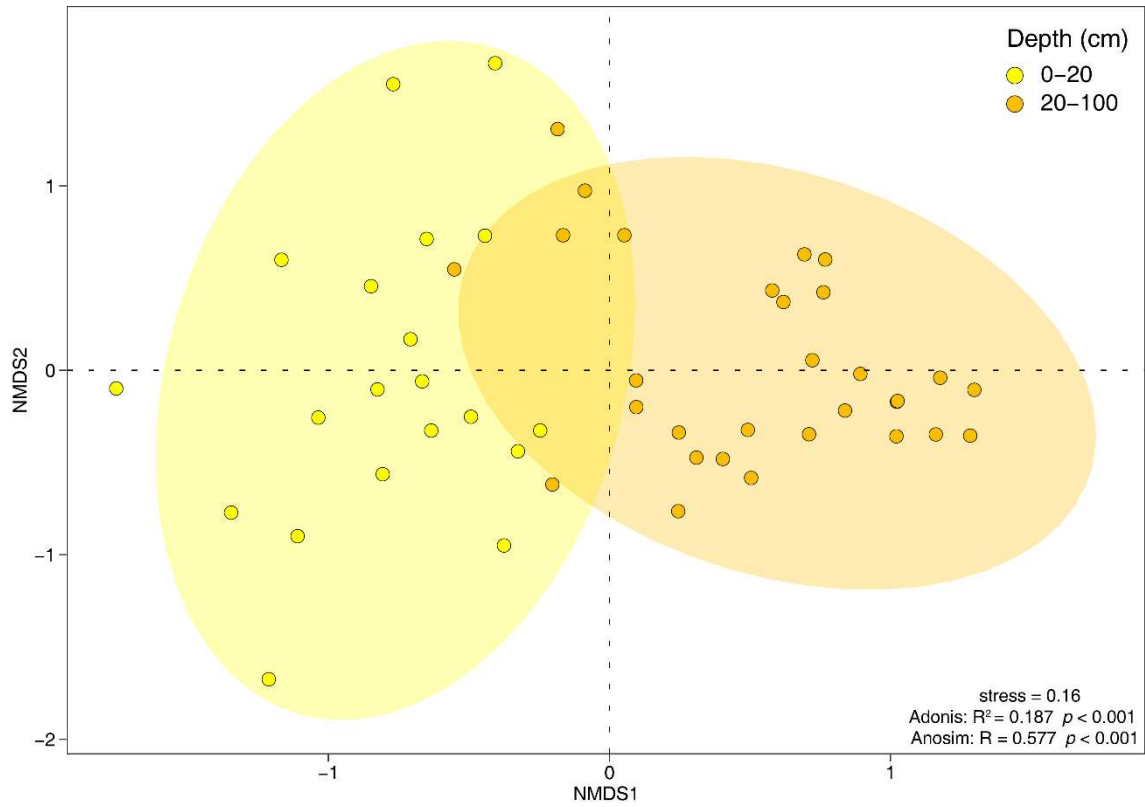

**Fig. S6.** NMDS ordinations representing the Bray–Curtis distances between Hg methylators across different depths (stress = 0.17).

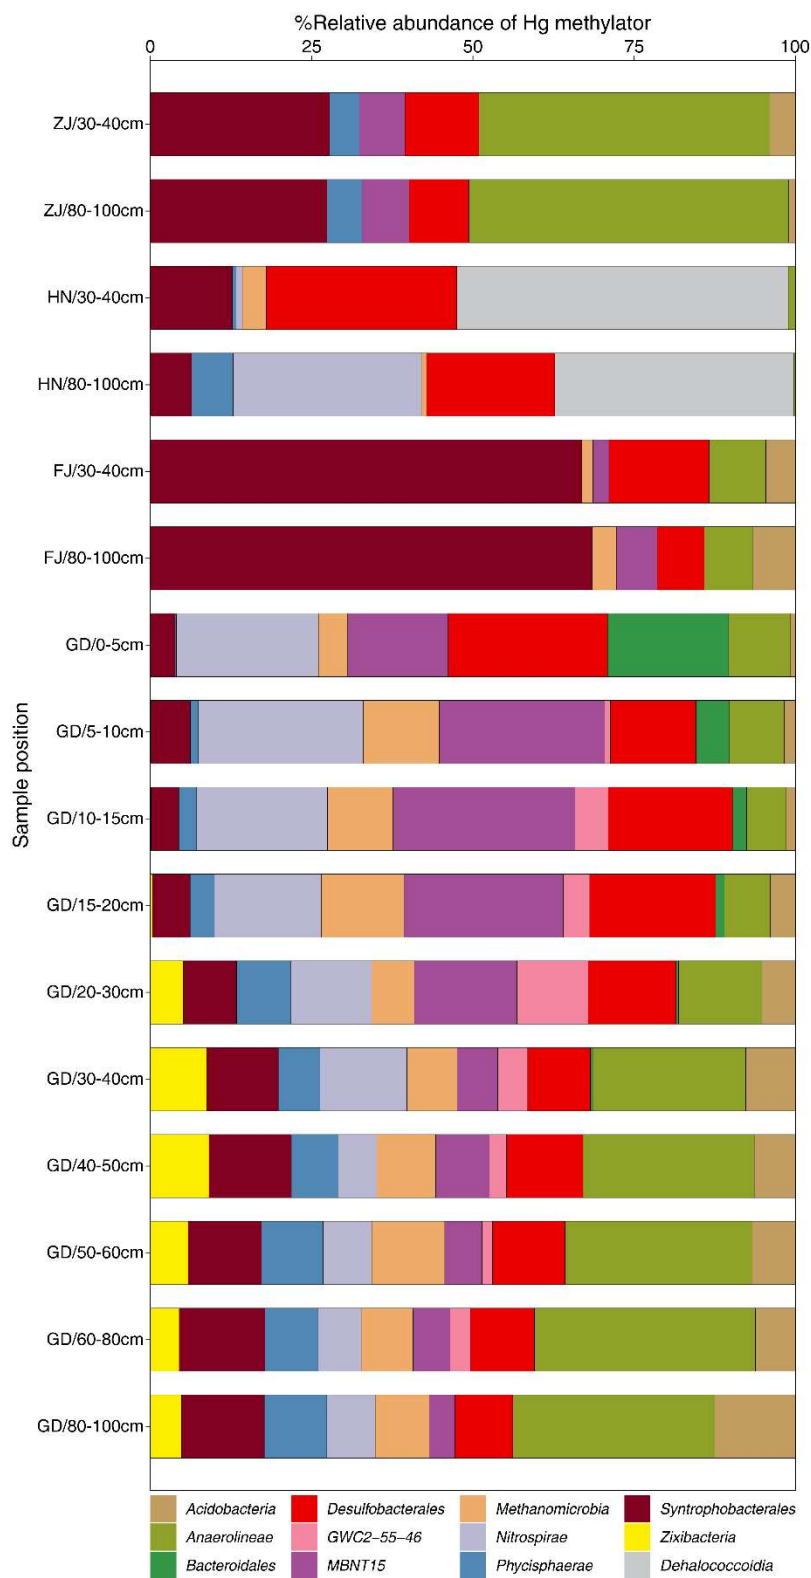

**Fig. S7.** Taxonomic profile of Hg methylator MAGs in the metagenomic data at four sampling mangrove sediments from Zhejiang, Hainan, Fujian, and Guangdong. Abbreviation: ZJ, Zhejiang; HN, Hainan; FJ, Fujian; GD, Guangdong. The abundance of Hg methylator MAGs is calculated by CoverM.



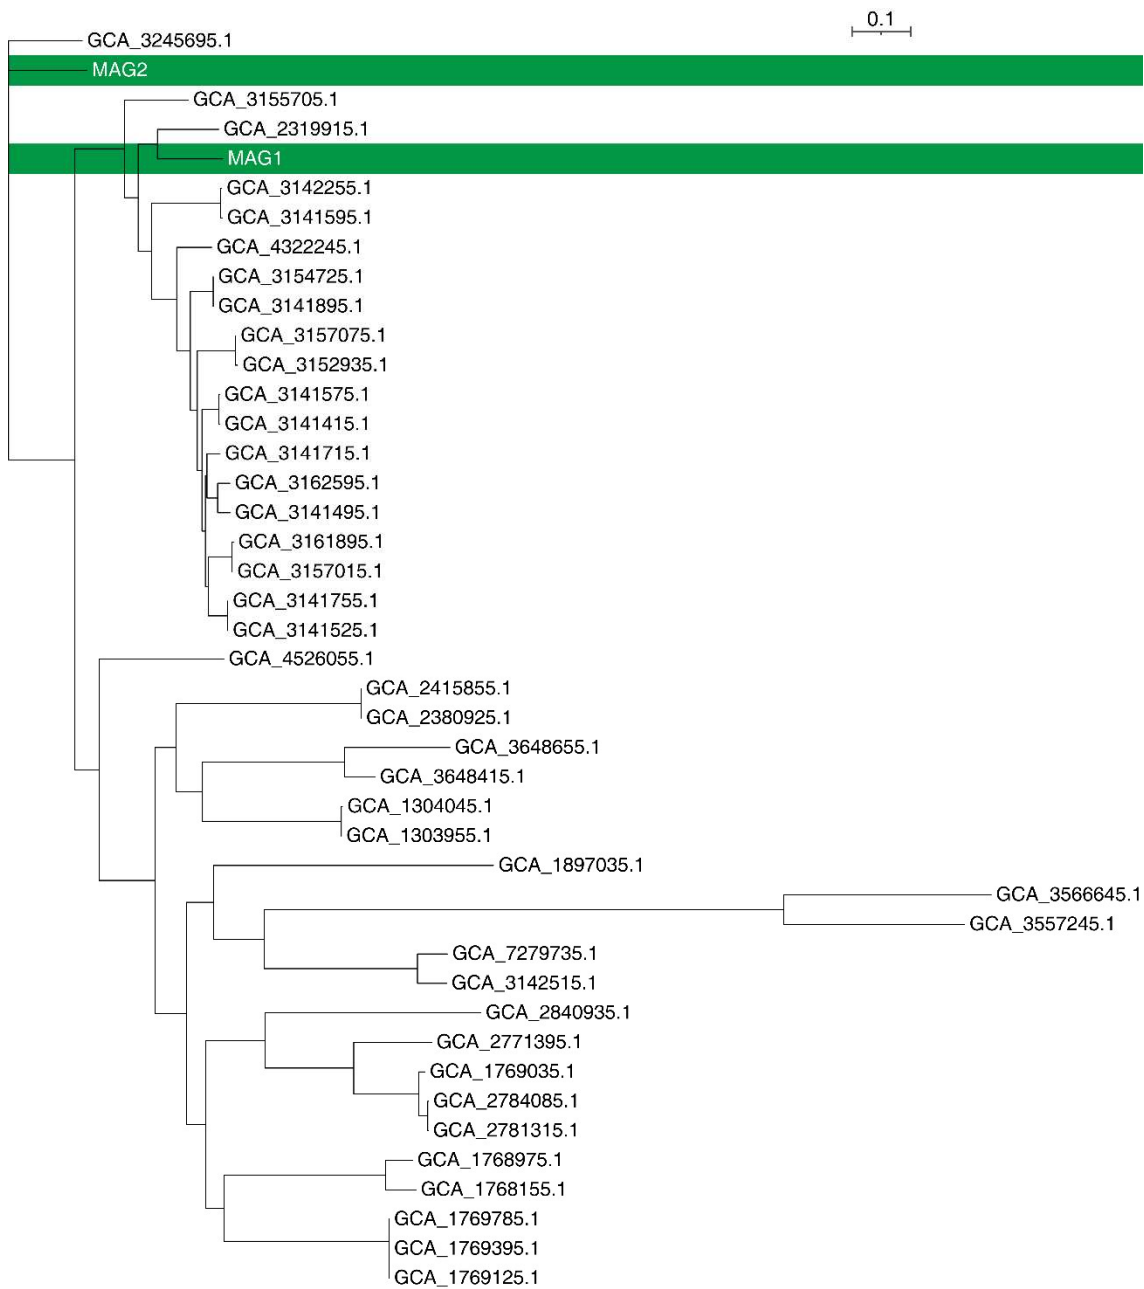

**Fig. S8.** Maximum likelihood tree (IQ-TREE 2, Q. yeast + F + R5) of specific marker proteins in *Bacteroidales* from *hgcA*-carrying MAGs and reference genomes from Hg-MATE-Db [1]. Names in white correspond to MAGs identified in this study. Genome names in black were pulled from Hg-MATE-Db and have the NCBI accession ID in parentheses.

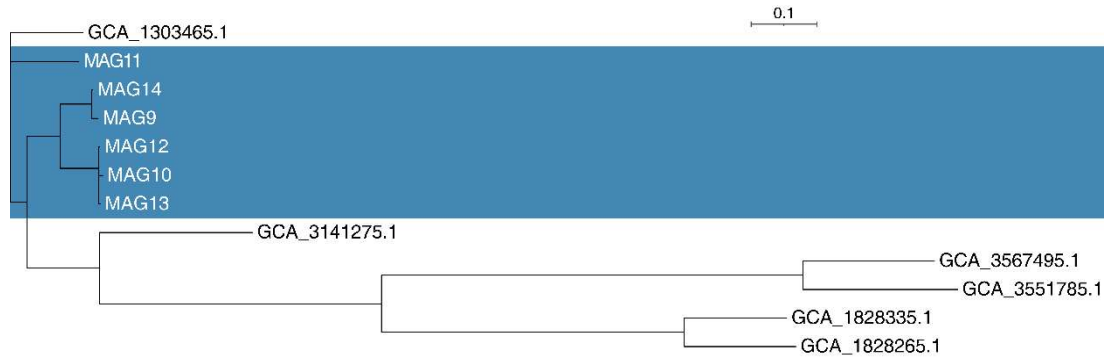

**Fig. S9.** Maximum likelihood tree (IQ-TREE 2, LG + G4) of specific marker proteins in *Phycisphaerae* from *hgcA*-carrying MAGs and reference genomes from Hg-MATE-Db [1]. Names in white correspond to MAGs identified in this study. Genome names in black were pulled from Hg-MATE-Db and have the NCBI accession ID in parentheses.

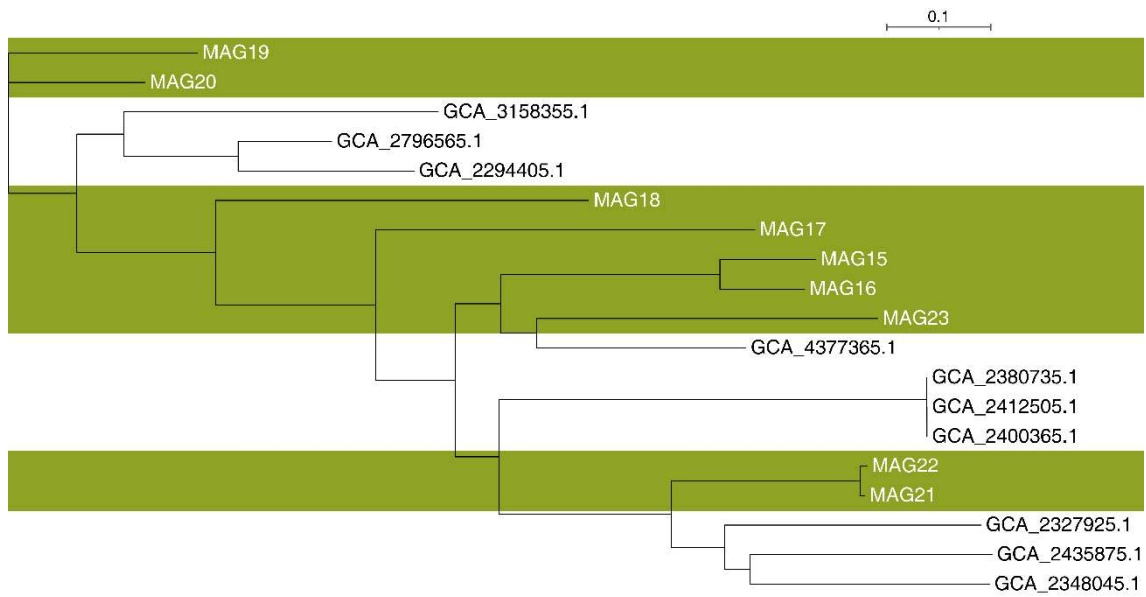

**Fig. S10.** Maximum likelihood tree (IQ-TREE 2, LG + F + I + G4) of specific marker proteins in *Anaerolineae* from *hgcA*-carrying MAGs and reference genomes from Hg-MATE-Db [1]. Names in white correspond to MAGs identified in this study. Genome names in black were pulled from Hg-MATE-Db and have the NCBI accession ID in paratheses.

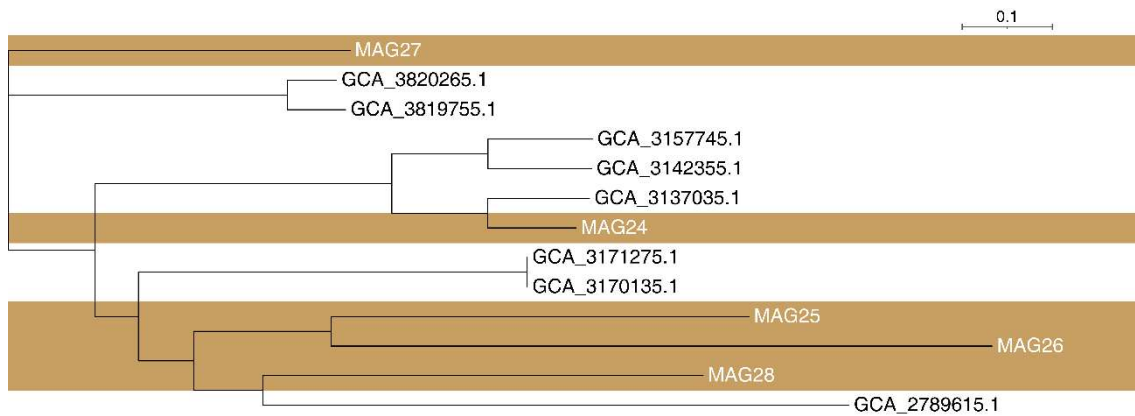

**Fig. S11.** Maximum likelihood tree (IQ-TREE 2, LG + F + G4) of specific marker proteins in *Acidobacteria* from *hgcA*-carrying MAGs and reference genomes from Hg-MATE-Db [1]. Names in white correspond to MAGs identified in this study. Genome names in black were pulled from Hg-MATE-Db and have the NCBI accession ID in paratheses.

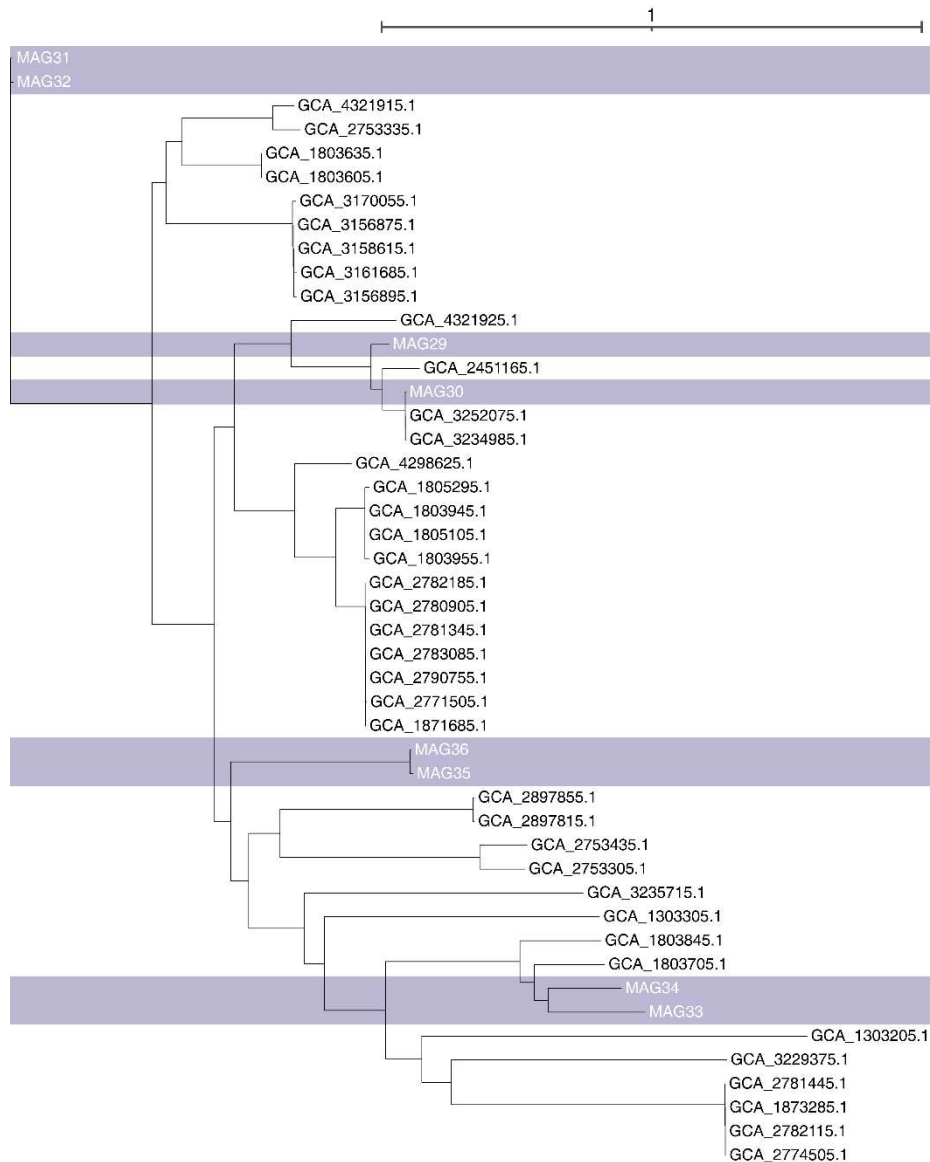

**Fig. S12.** Maximum likelihood tree (IQ-TREE 2, Q. yeast + F + I + I + R4) of specific marker proteins in *Nitrospirae* from *hgcA*-carrying MAGs and reference genomes from Hg-MATE-Db [1]. Names in white correspond to MAGs identified in this study. Genome names in black were pulled from Hg-MATE-Db and have the NCBI accession ID in paratheses.

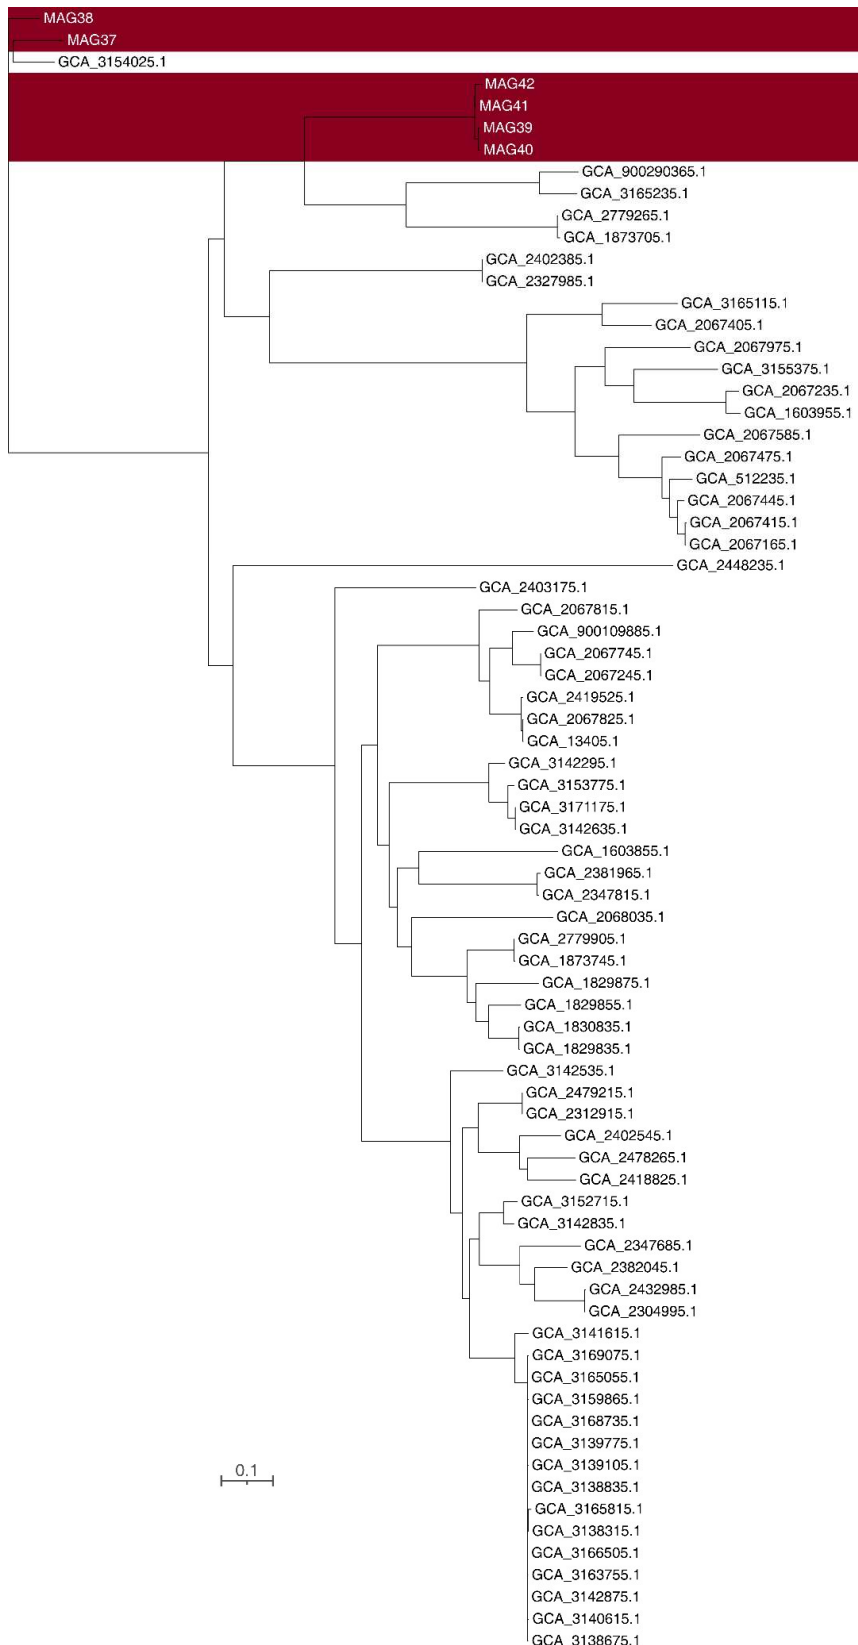

**Fig. S13.** Maximum likelihood tree (IQ-TREE 2, Q. yeast + F + I + I + R5) of specific marker proteins in *Syntrophobacterales* from *hgcA*-carrying MAGs and reference genomes from Hg-MATE-Db [1]. Names in white correspond to MAGs identified in this study. Genome names in black were pulled from Hg-MATE-Db and have the NCBI accession ID in parentheses.

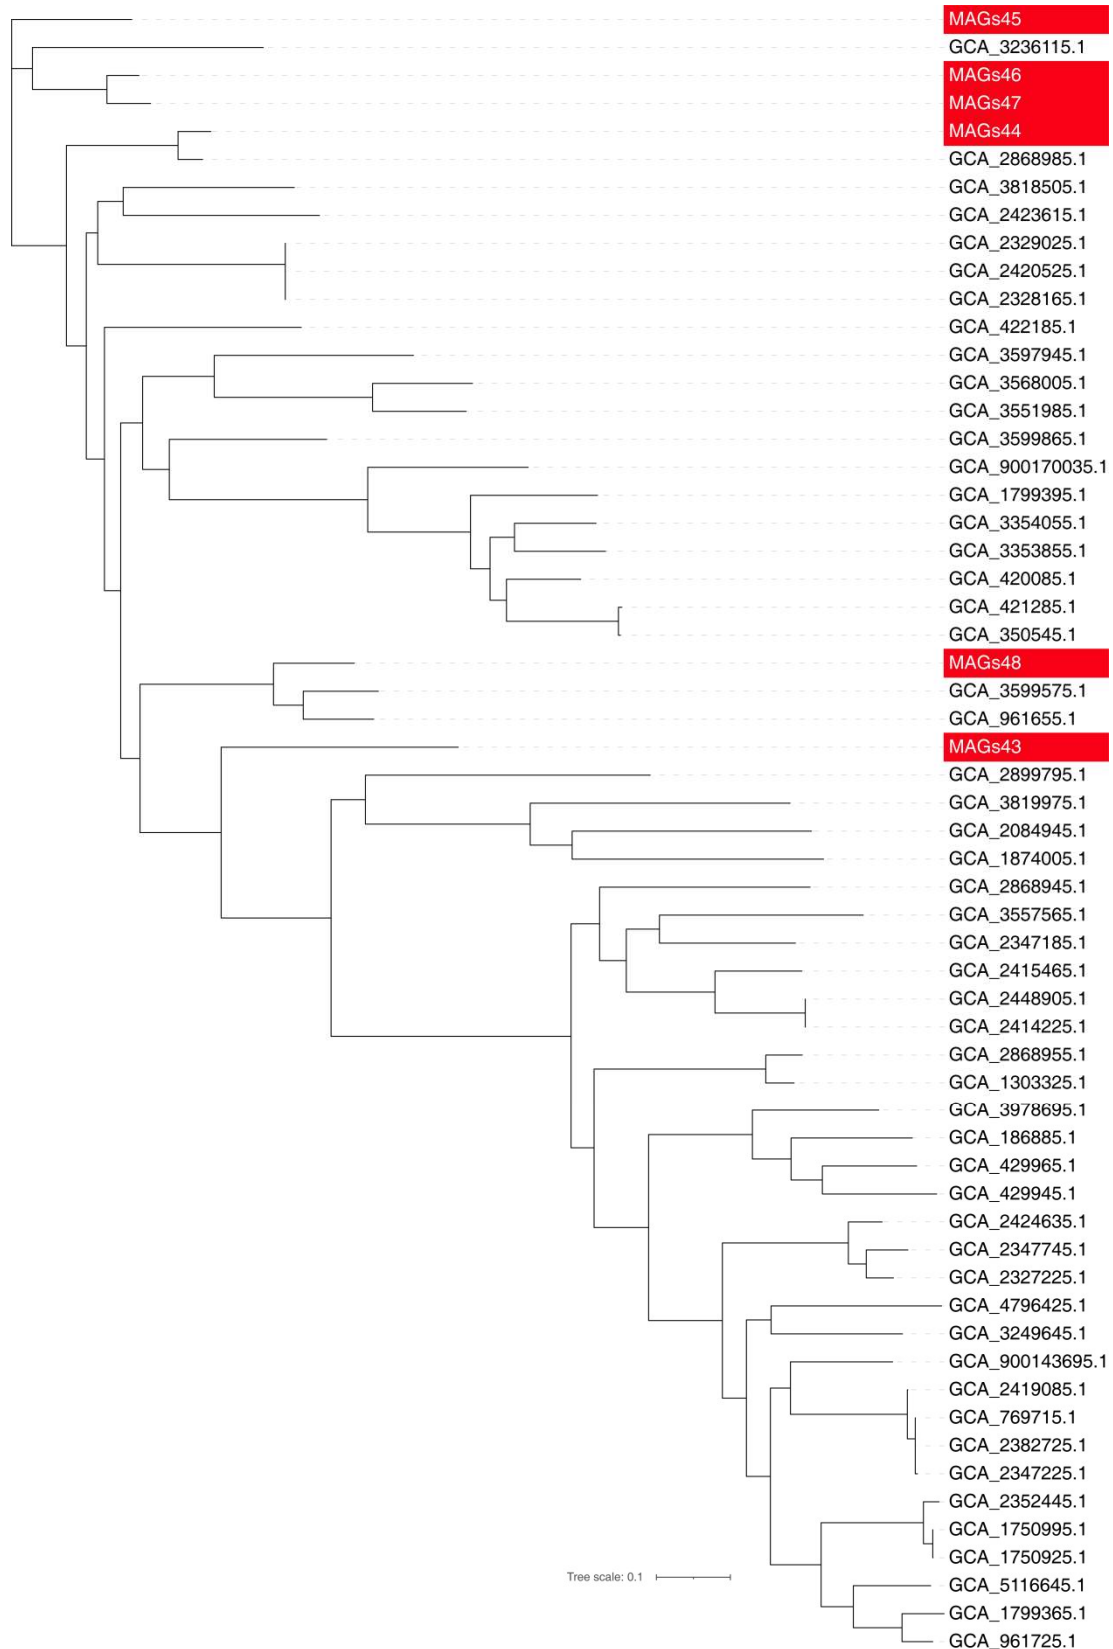

**Fig. S14.** Maximum likelihood tree (IQ-TREE 2, GTR20+F+R5) of specific marker proteins in *Desulfobacterales* from *hgcA*-carrying MAGs and reference genomes from Hg-MATE-Db [1]. Names in white correspond to MAGs identified in this study. Genome names in black were pulled from Hg-MATE-Db and have the NCBI accession ID in paratheses.

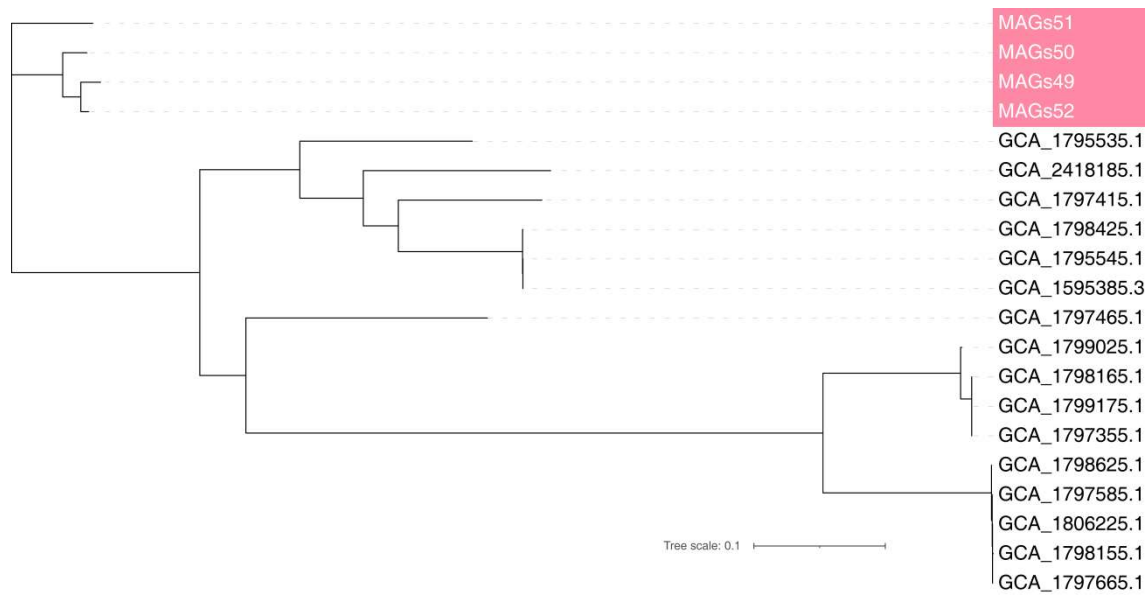

**Fig. S15.** Maximum likelihood tree (IQ-TREE 2, Q.insect+F+R3) of specific marker proteins in *GWC2-55-46* from *hgcA*-carrying MAGs and reference genomes from Hg-MATE-Db [1]. Names in white correspond to MAGs identified in this study. Genome names in black were pulled from Hg-MATE-Db and have the NCBI accession ID in paratheses.



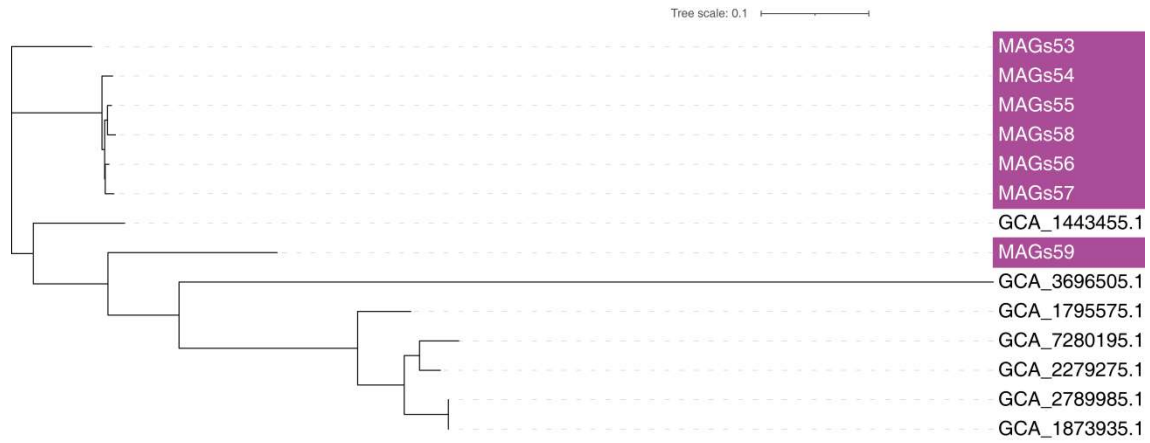

**Fig. S16.** Maximum likelihood tree (IQ-TREE 2, Q.insect+F+G4) of specific marker proteins in *MBNT15* from *hgcA*-carrying MAGs and reference genomes from Hg-MATE-Db [1]. Names in white correspond to MAGs identified in this study. Genome names in black were pulled from Hg-MATE-Db and have the NCBI accession ID in parentheses.

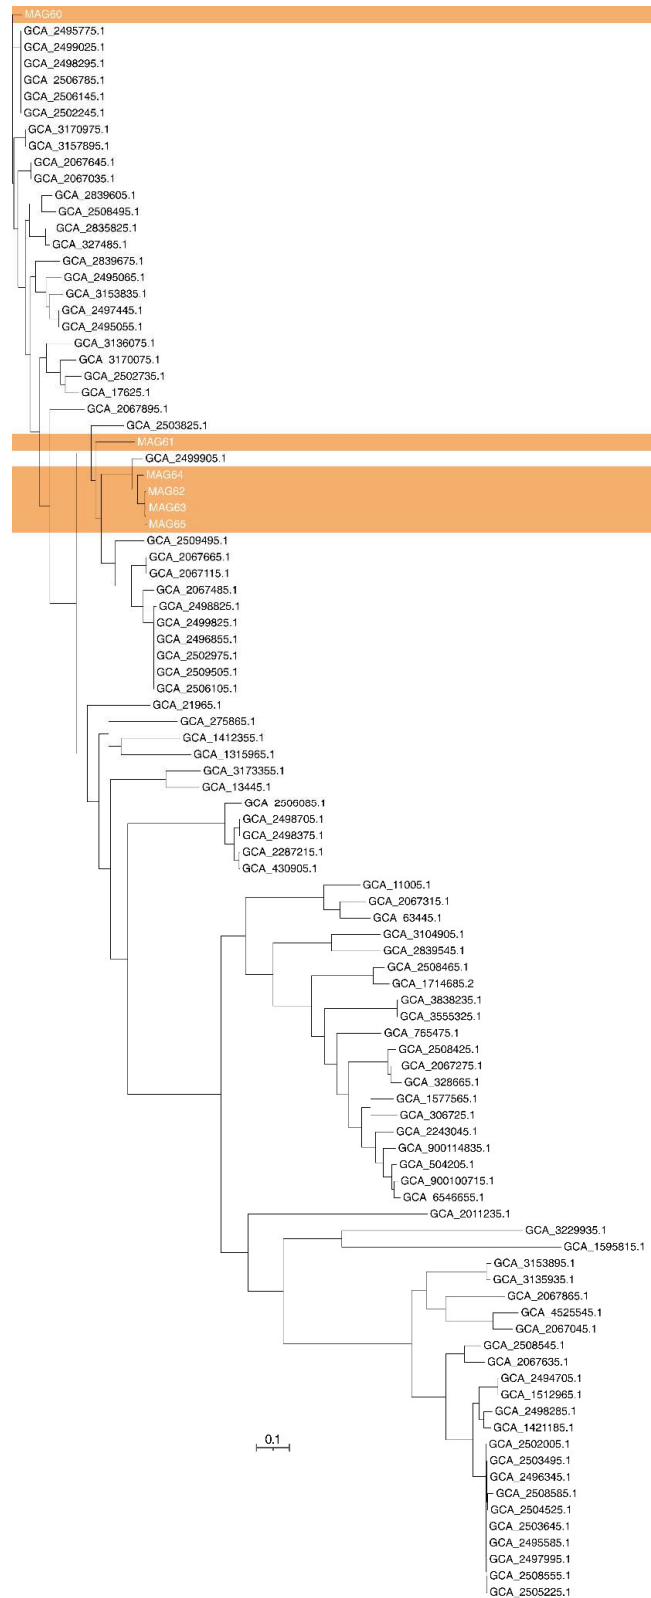

**Fig. S17.** Maximum likelihood tree (IQ-TREE 2, Q. insect + F + I + I + R2) of specific marker proteins in *Methanomicrobia* from *hgcA*-carrying MAGs and reference genomes from Hg-MATE-Db [1]. Names in white correspond to MAGs identified in this study. Genome names in black were pulled from Hg-MATE-Db and have the NCBI accession ID in parentheses.

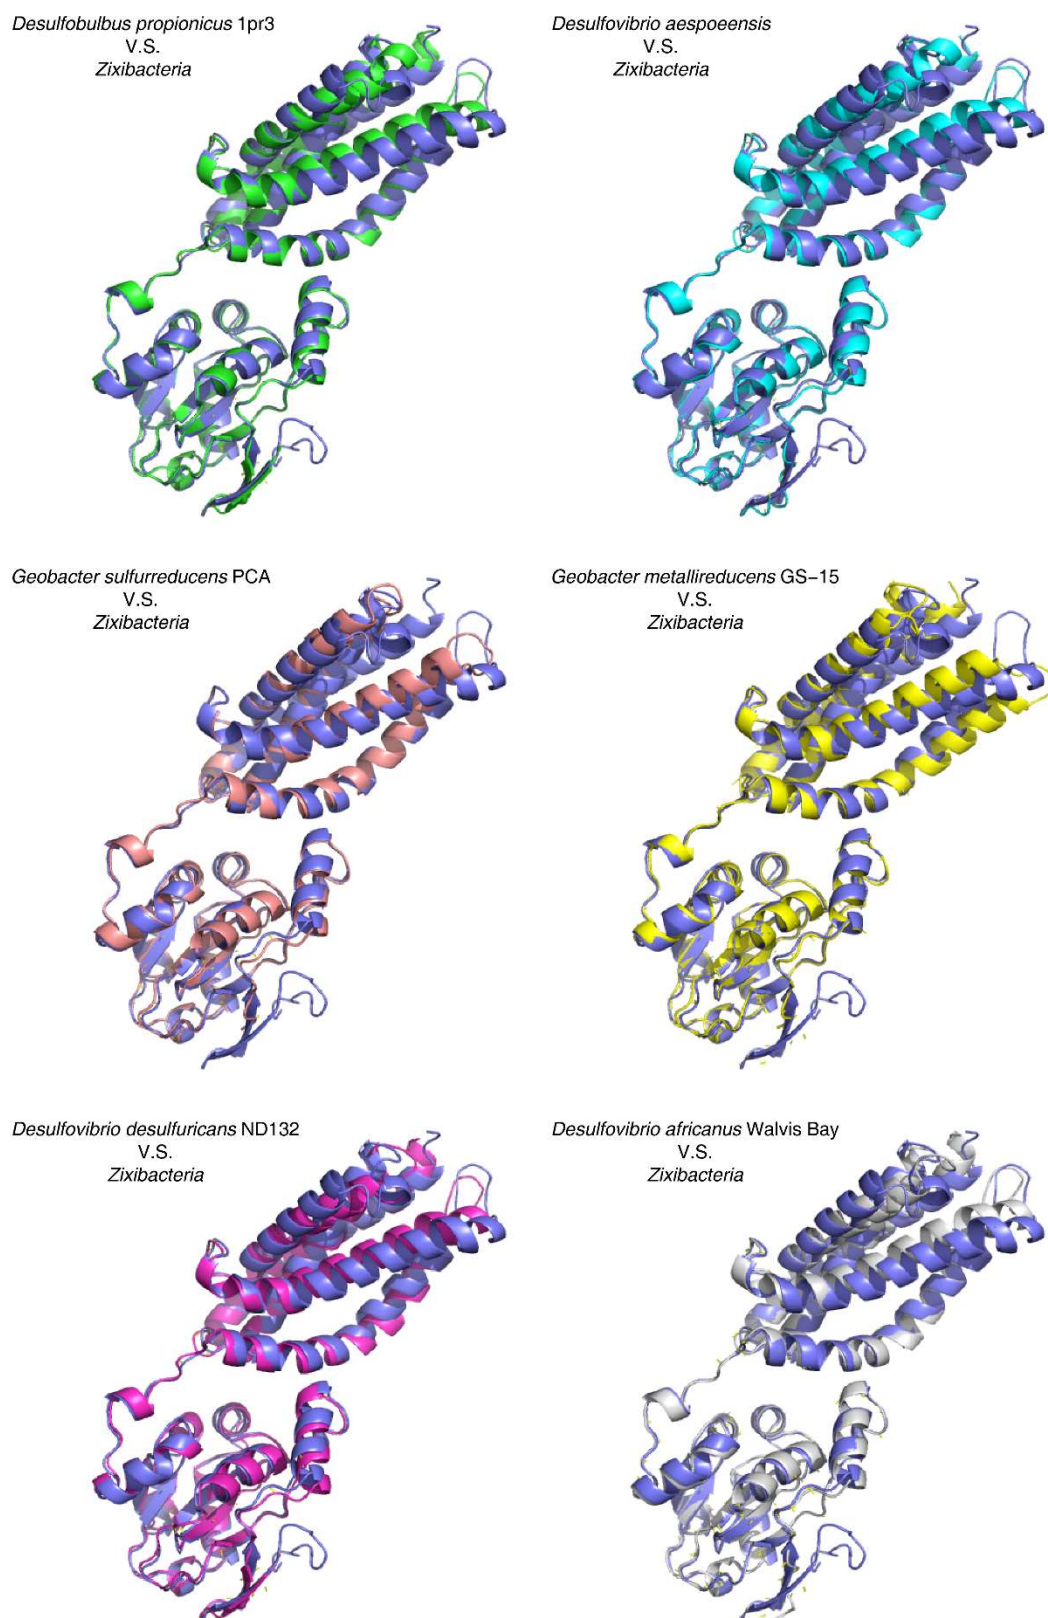

**Fig. S18.** Alignments between HgcA AlphaFold2 models of *Zixibacteria* and six confirmed Hg-methylating bacterial strains.

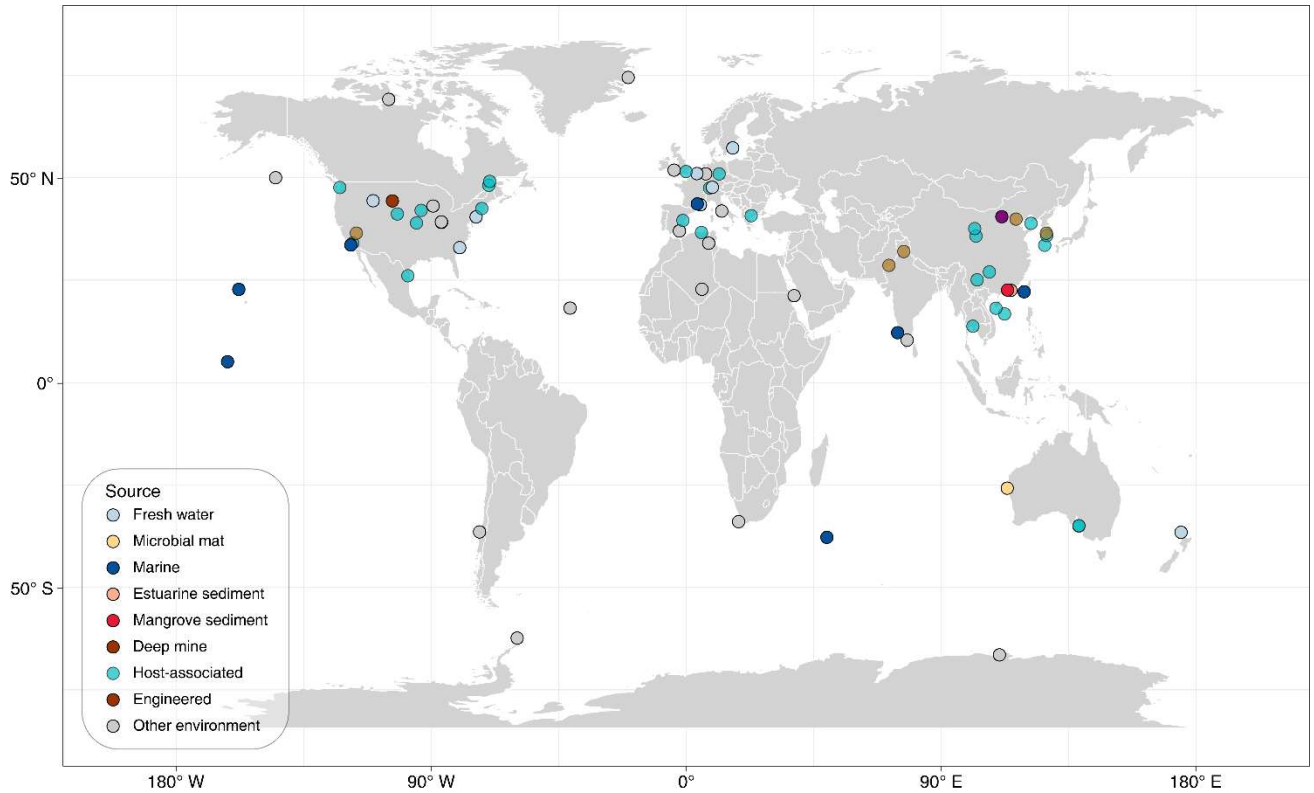

**Fig. S19.** Schematic map representing the global distribution of *Zixibacteria*. The dataset used corresponds to metagenome-derived 16S rRNA gene sequences homologous to *Zixibacteria*. Different colors represent the geographic location of the respective metagenomic samples.

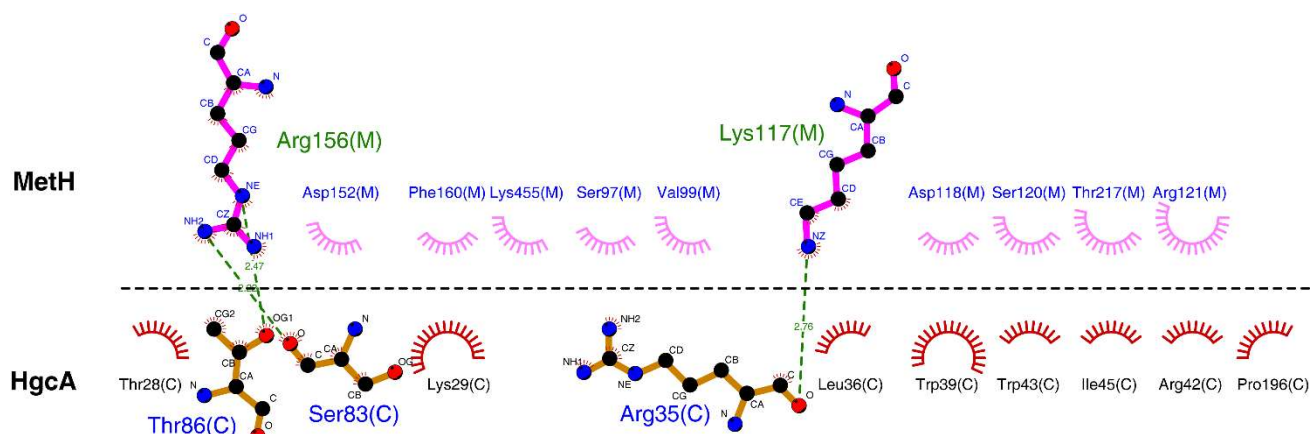

**Fig. S20.** Schematic representation of HgcA-MetH interaction in the 2D structure. Below the black dashed line is the HgcA protein, and above it is the MetH protein. Carbon atoms are depicted in black, oxygen atoms in red, and nitrogen atoms in blue. Green dashed lines represent hydrogen bonds, with the green numbers indicating the bond lengths. Red dashed lines represent salt bridges, while amino acid residues engaged in hydrophobic interactions are denoted by semicircles.

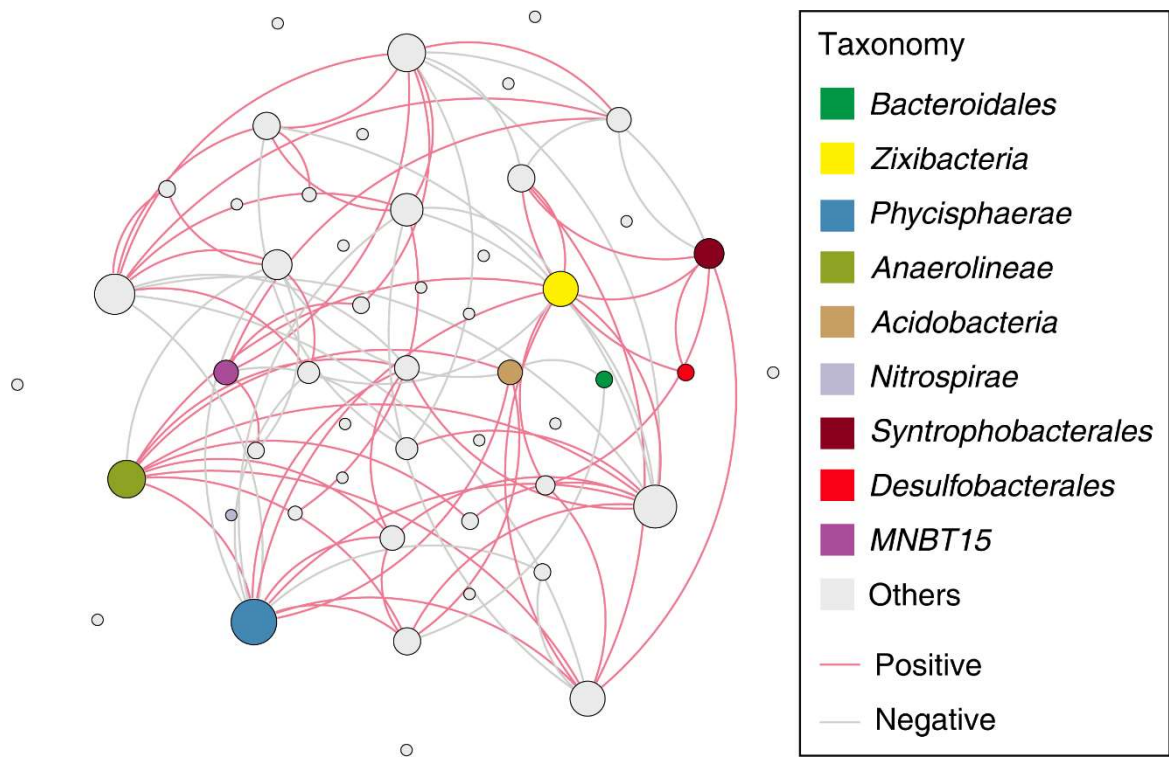

**Fig. S21.** Co-occurrence between syntrophic *Syntrophobacterales* and *Zixibacteria* revealed by 16S rRNA gene-based microbial network inference.

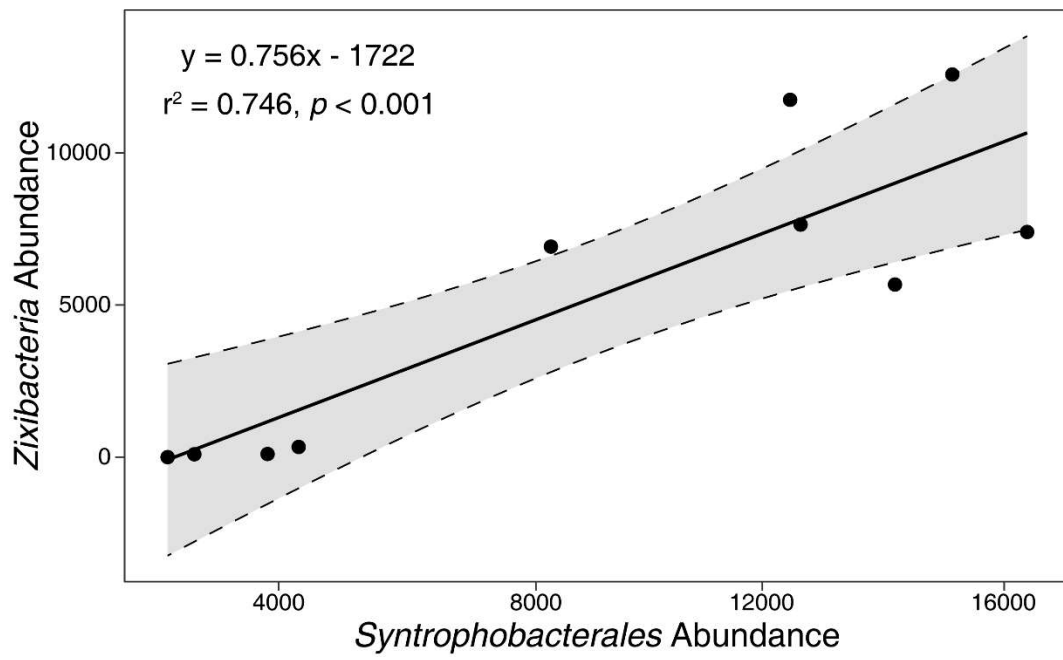

**Fig. S22.** Relationship between syntrophic *Syntrophobacterales* and *Zixibacteria* in abundance across the mangrove sediment column.

**Table S1.** General patterns in Hg isotope fractionation according to previous study [2].

| <b>Process</b>                            | <b><math>\Delta^{199}\text{Hg}/\delta^{202}\text{Hg}</math> ratio</b> |
|-------------------------------------------|-----------------------------------------------------------------------|
| Photochemical reduction from snow         | -3.5                                                                  |
| Xenon lamp reduction with thiol ligands   | -0.8                                                                  |
| Aqueous photochemical reduction           | 1.2                                                                   |
| Aqueous photochemical demethylation       | 2.4                                                                   |
| Equilibrium evaporation                   | 0.1                                                                   |
| Thiol-ligand binding /iron oxide sorption | 0                                                                     |
| Microbial methylation                     | 0                                                                     |
| Microbial reduction/demethylation         | 0                                                                     |



**Table S2.** Isotopic compositions of Hg in mangrove sediment.

| Sample  | Depth (cm) | $\delta^{202}\text{Hg}$ | $\Delta^{201}\text{Hg}$ | $\Delta^{200}\text{Hg}$ | $\Delta^{199}\text{Hg}$ |
|---------|------------|-------------------------|-------------------------|-------------------------|-------------------------|
| 0-5-1   |            | -0.99                   | 0.05                    | 0.02                    | -0.06                   |
| 0-5-2   | 0-5        | -1.24                   | -0.05                   | 0.07                    | -0.05                   |
| 0-5-3   |            | -1.42                   | -0.03                   | 0.06                    | -0.05                   |
| 40-50-1 |            | -1.20                   | 0.01                    | 0.03                    | -0.02                   |
| 40-50-2 | 40-50      | -1.52                   | -0.11                   | -0.06                   | -0.09                   |
| 40-50-3 |            | -1.31                   | -0.10                   | 0.00                    | -0.11                   |
| 60-80-1 |            | -1.05                   | -0.18                   | -0.09                   | -0.20                   |
| 60-80-2 | 60-80      | -0.71                   | -0.09                   | 0.04                    | -0.18                   |
| 60-80-3 |            | -0.67                   | -0.18                   | -0.02                   | -0.20                   |

**Table S3.** The habitat-specific distribution of Hg-methylating lineage.

| <b>Microbial group</b>     | <b>Mangrove sediments</b> | <b>Paddy soils</b> | <b>Lake water</b> | <b>Lake sediments</b> | <b>Brackish water</b> | <b>Reservoir sediments</b> |
|----------------------------|---------------------------|--------------------|-------------------|-----------------------|-----------------------|----------------------------|
| <i>Euryarchaeota</i>       | Present                   | Present            | Present           | Present               | Absent                | Present                    |
| <i>Chloroflexi</i>         | Present                   | Present            | Present           | Present               | Present               | Present                    |
| PVC                        | Present                   | Present            | Absent            | Absent                | Present               | Present                    |
| <i>Bacteroidetes</i>       | Present                   | Present            | Present           | Present               | Absent                | Present                    |
| <i>Acidobacteria</i>       | Present                   | Present            | Absent            | Absent                | Absent                | Present                    |
| <i>Firmicutes</i>          | Absent                    | Present            | Present           | Present               | Present               | Absent                     |
| <i>Spirochaetes</i>        | Absent                    | Present            | Present           | Present               | Present               | Absent                     |
| <i>Deltaproteobacteria</i> | Present                   | Present            | Present           | Present               | Present               | Present                    |
| <i>Nitrospirae</i>         | Present                   | Present            | Absent            | Absent                | Absent                | Present                    |

**Table S4.** Confirmed Hg-methylating bacterial strains with completely sequenced genomes.

| <b><i>Organism name</i></b>                  | <b>Goldstamp ID<sup>1</sup></b> | <b>Culture collections</b> | <b>Isolation source</b>             |
|----------------------------------------------|---------------------------------|----------------------------|-------------------------------------|
| <i>Desulfovibrio desulfuricans</i><br>ND132  | Gi03061                         | -                          | Mesohaline Chesapeake Bay sediments |
| <i>Desulfovibrio aespoeensis</i>             | Gc01651                         | DSM 10631                  | Deep groundwater                    |
| <i>Desulfovibrio africanus</i><br>Walvis Bay | Gi03062                         | ATCC 19997, NCIB 8397      | Marine sediments, Walvis Bay        |
| <i>Desulfobulbus propionicus</i><br>lpr3     | Gc01599                         | DSM 2032, ATCC 33891       | Freshwater mud                      |
| <i>Geobacter sulfurreducens</i><br>PCA       | Gc00166                         | DSM 12127, ATCC 51573      | Ditch surface sediment              |
| <i>Geobacter metallireducens</i><br>GS-15    | Gc00314                         | DSM 7210, ATCC 53774       | Freshwater sediment                 |

<sup>1</sup> Genomes OnLine Database – GOLD

## References

1. E. Capo, B. D. Peterson, M. Kim, D. S. Jones, S. G. Acinas, M. Amyot *et al.*, A consensus protocol for the recovery of mercury methylation genes from metagenomes. *Mol Ecol Resour.* **23**, 190-204 (2023).
2. J. D. Blum, Applications of stable mercury isotopes to biogeochemistry. *Handbook of Environmental Isotope Geochemistry: Vol I*, 229-245 (2012).
